# Supplementary material for: Defect accommodation in nanostructured soft crystals
Source: Royal Society of Chemistry journal article supplement (doi:10.1039/c3nr05124b), 2013-11-26
Supplement: c3nr05124b.pdf [file c3nr05124b.pdf]

Cite this: DOI: 10.1039/c0xx00000x

www.rsc.org/xxxxxx

ARTICLE TYPE

## Defect accommodation in nanostructured soft crystals

### (Supporting Information)

Alexander Exner<sup>a)</sup>, Sabine Rosenfeldt<sup>a)</sup>, Steffen Fischer<sup>b)</sup>, Peter Lindner<sup>c)</sup> and Stephan Förster<sup>\*a)</sup>

5

#### Azimuthal peak shape function

If the peak shapes are mainly determined by the radial and azimuthal peak shapes, the peak shape function can be factorized into a radial part  $L_q(q, g_{hkl})$  depending on the modulus of the scattering vector, and an azimuthal part  $L_\psi(q, g_{hkl}, \psi_{hkl})$  depending on the angle  $\psi_{hkl} = \arccos(g_{hkl} q / (g_{hkl} \|q\|))$  between the scattering vector and the reciprocal lattice vector such that

$$L_{hkl}(\mathbf{q}, \mathbf{g}_{hkl}) = L_q(q, g_{hkl}) L_\psi(q, g_{hkl}, \psi_{hkl}) \quad (\text{S1})$$

15

The normalized radial peak shape functions are given by

$$L_q(q, g_{hkl}) = \begin{cases} \frac{2}{\pi \delta_q} \exp\left[-\frac{4(\mathbf{q} - \mathbf{g}_{hkl})^2}{\pi \delta_q^2}\right] & \text{Gaussian} \\ \frac{\delta_q}{2\pi} \left(1 + \frac{4(\mathbf{q} - \mathbf{g}_{hkl})^2}{\delta_q^2}\right)^{-1} & \text{Lorentzian} \end{cases} \quad (\text{S2})$$

20 where  $\delta_q$  is the radial peak width which in case of a Lorentzian is equal to the full width at half maximum (FWHM). For a Gaussian it is related to the standard deviation as  $\sigma_q = \sqrt{\pi/8} \delta_q$ . Other peak shapes such as Pseudo-Voigt or Pearson VII did not lead to significant improvements in the simulations outlined below.

25 The normalized azimuthal peak shape functions are given by

$$L_\psi(q, g_{hkl}, \psi_{hkl}) = \begin{cases} \frac{1}{2\pi g_{hkl}^2 K(a_{hkl})} \exp\left[-\frac{4\psi_{hkl}^2 q^2}{\pi \delta_\psi^2}\right] & \text{Gaussian} \\ \frac{1}{2\pi g_{hkl}^2 K(b_{hkl})} \left(1 + \frac{4\psi_{hkl}^2 q^2}{\pi \delta_\psi^2}\right)^{-1} & \text{Lorentzian} \end{cases} \quad (\text{S3})$$

with  $a_{hkl} = \frac{4g_{hkl}^2}{\pi \delta_\psi^2}$  and  $b_{hkl} = \frac{4g_{hkl}^2}{\delta_\psi^2}$ .  $K(a_{hkl})$  and  $K(b_{hkl})$  are

30 normalization functions which are derived in Ref. [23] In the

isotropic limit ( $a_{hkl}, b_{hkl} \rightarrow 0$ ) the azimuthal peak shape functions reduce to  $L_\psi(g_{hkl}) = (4\pi g_{hkl}^2)^{-1}$ .

35

Complete set of scattering patterns

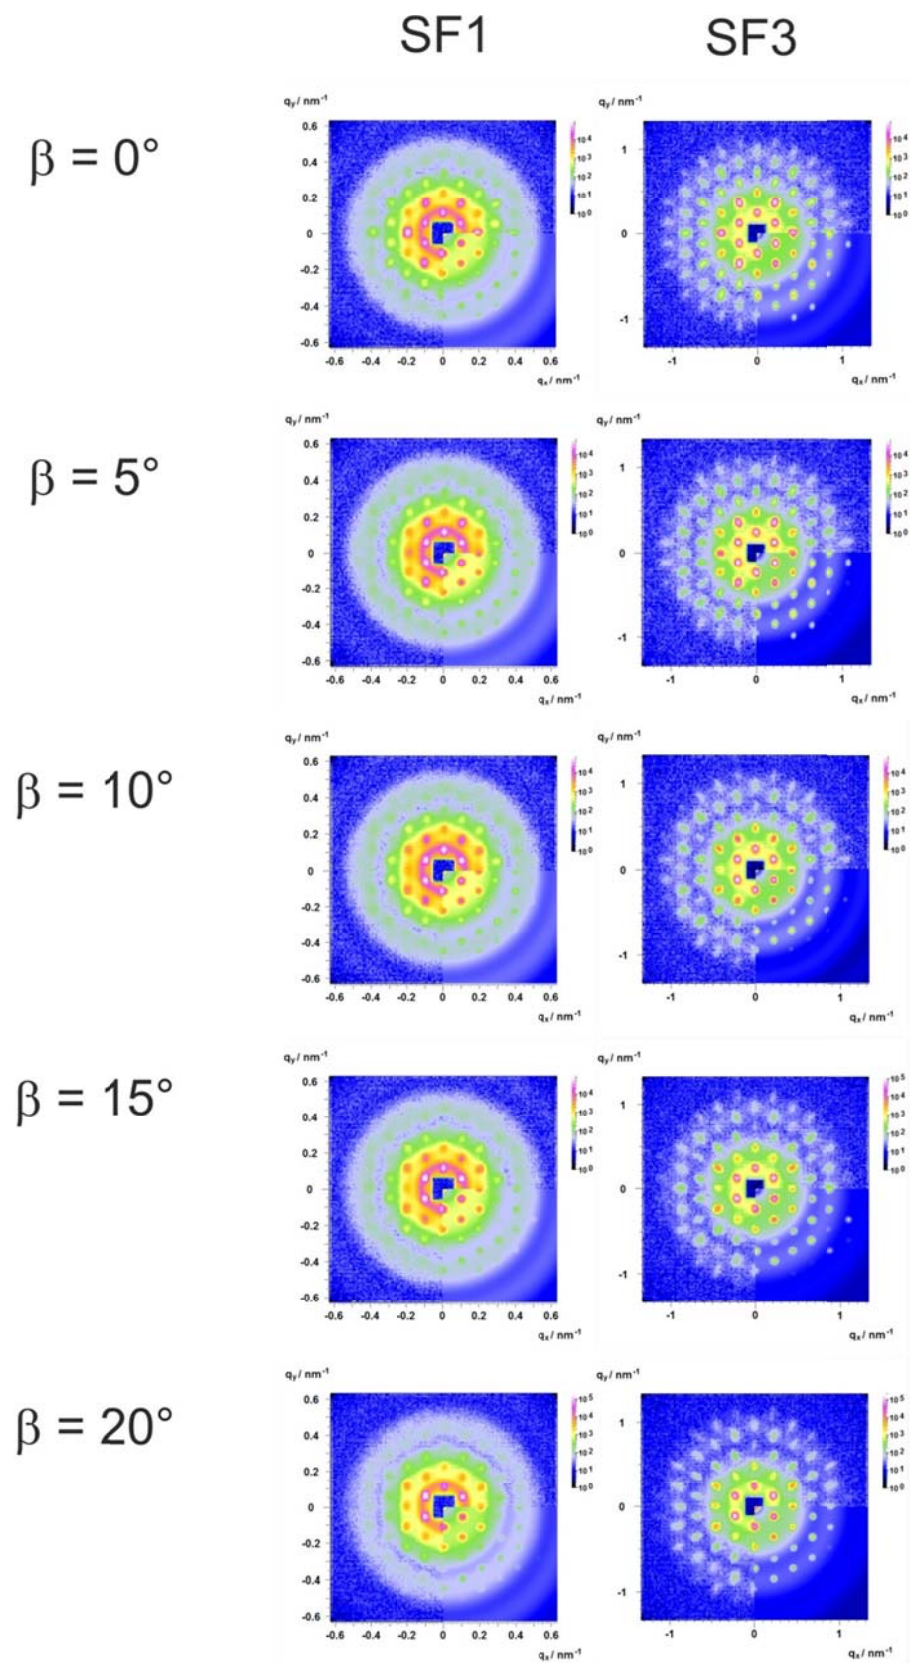

Cite this: DOI: 10.1039/c0xx00000x

www.rsc.org/xxxxxx

ARTICLE TYPE

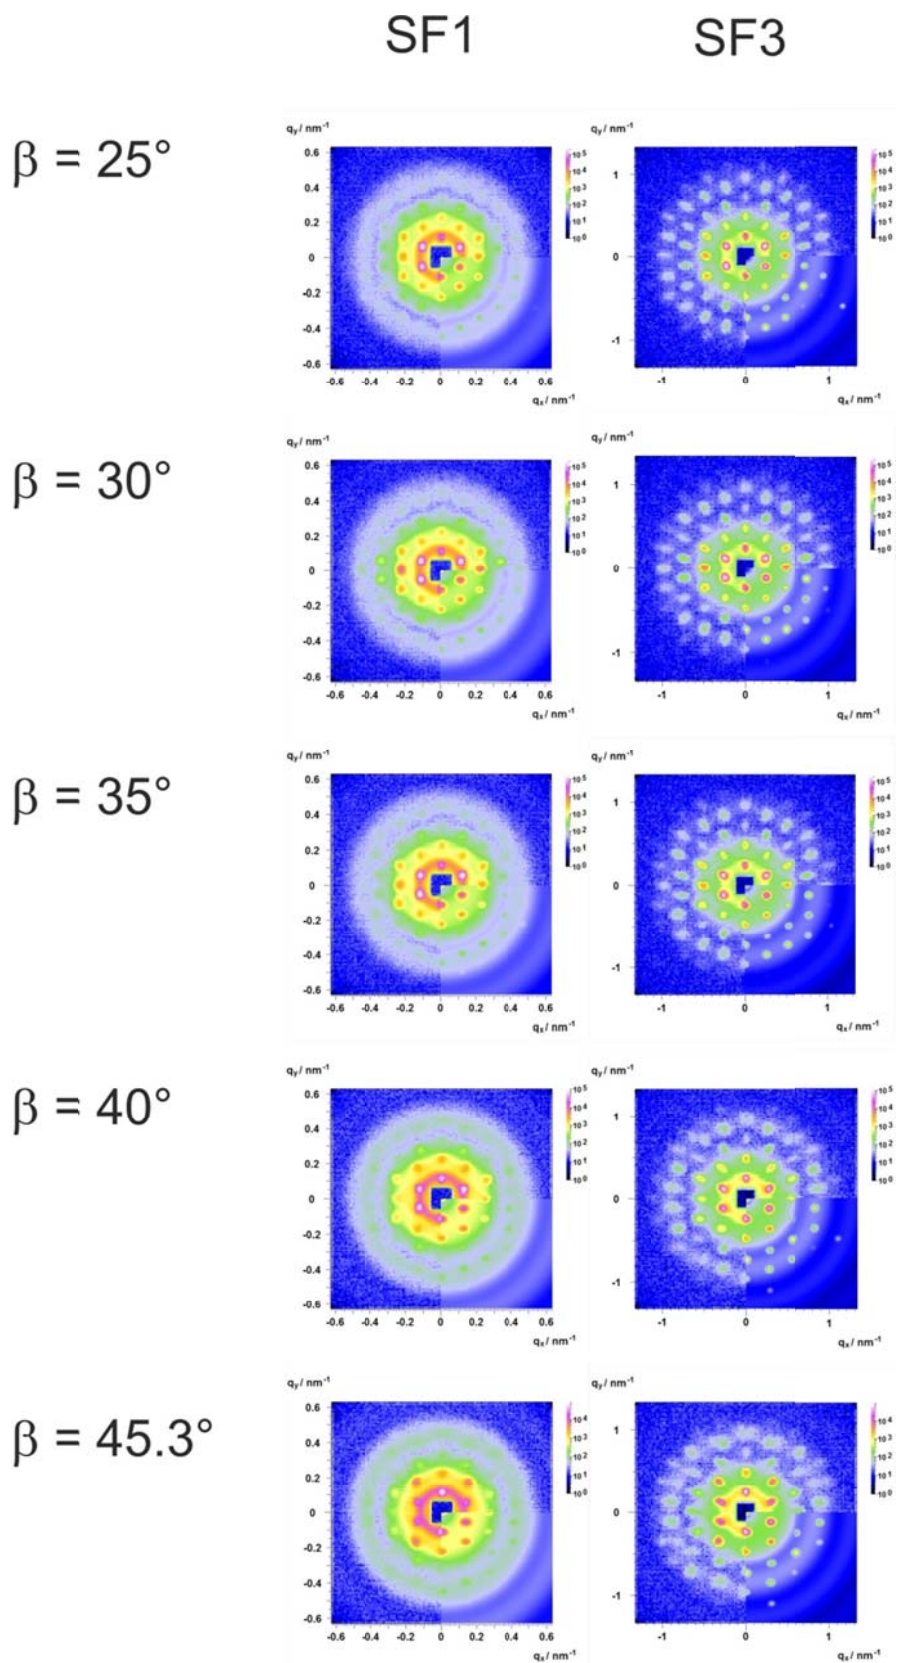

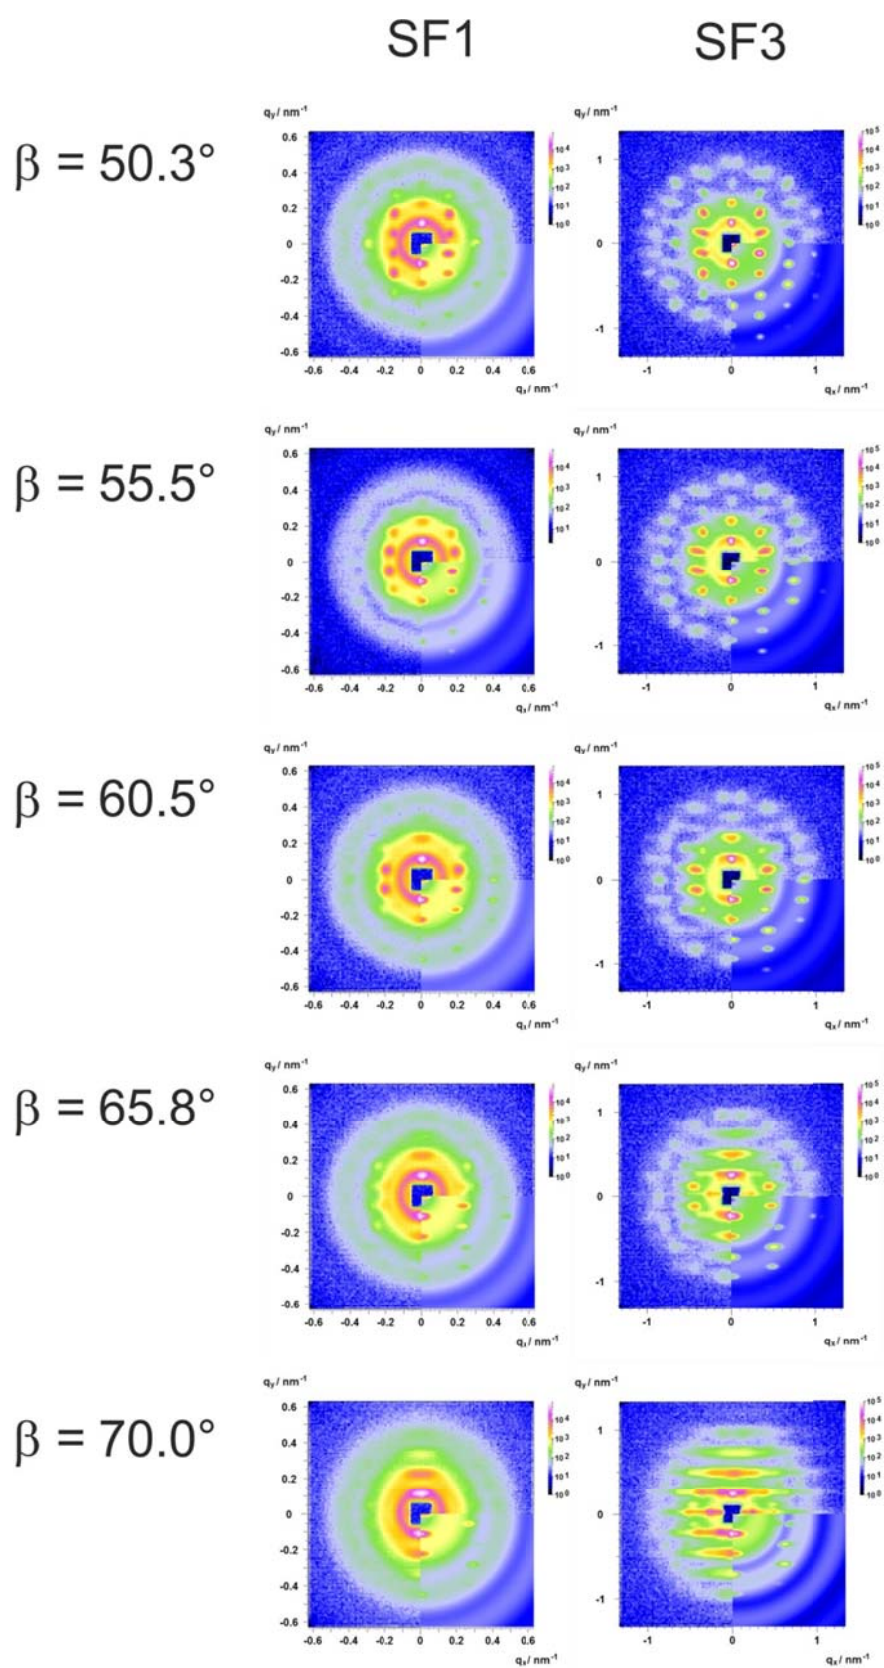

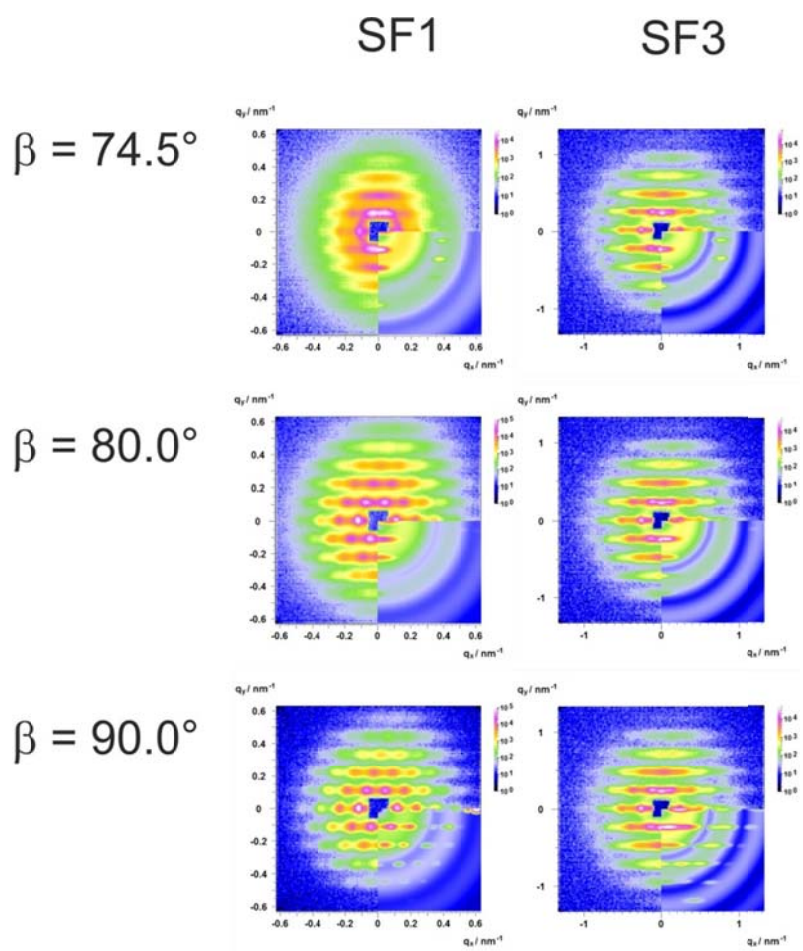

5

10
